# Supplementary material
Source: Elsevier journal article supplement (https://www.sciencedirect.com/science/article/pii/S2341287920300806)
Supplement: mmc1 [file S2341287920300806:mmc1.pdf]

## Lista de preguntas de las versiones españolas del cuestionario PaPEQu

| 1. Apoyo a la unidad familiar                                                                                                                                 | Presente en la versión del cuestionario |          |
|---------------------------------------------------------------------------------------------------------------------------------------------------------------|-----------------------------------------|----------|
| Preguntas de evaluación de las experiencias de los padres:<br>Escala analógica de 7 puntos, nunca - siempre                                                   | General                                 | Neonatal |
| (1) Sentí que me respetaban durante la difícil situación de mi hijo.                                                                                          | ✓                                       | ✓        |
| (2) Pude participar en el cuidado de mi hijo tanto como desee.                                                                                                | ✓                                       | ✓        |
| (3) a. Durante el cuidado de mi hijo, cada vez que he necesitado despejarme, había alguien para relevarme (por ejemplo, un enfermero, auxiliar o voluntario). | ✓                                       | —        |
| (3) b. Mi privacidad fue respetada.                                                                                                                           | —                                       | ✓        |
| (4) Mis preocupaciones y mis miedos los ha tenido en cuenta el equipo de asistencia.                                                                          | ✓                                       | ✓        |
| (5) Siempre he confiado en el equipo de asistencia.                                                                                                           | ✓                                       | ✓        |
| (6) ¿A qué servicios de apoyo habéis tenido acceso durante las últimas 4 semanas de vida de vuestro hijo?                                                     | ✓                                       | ✓        |
| Preguntas de evaluación de las necesidades de los padres:<br>Escala analógica de 7 puntos, no tan importante - muy importante                                 |                                         |          |
| <b>Necesitaba...</b>                                                                                                                                          |                                         |          |
| (7) a. Participar en el cuidado de mi hijo.                                                                                                                   | ✓                                       | —        |
| (7) b. Poder dormir en el hospital al lado de mi hijo.                                                                                                        | —                                       | ✓        |
| (8) a. Poder despejarme a ratos del cuidado de mi hijo.                                                                                                       | ✓                                       | —        |
| (8) b. Disponer de una habitación en el hospital donde poder tener intimidad y estar con la familia en privado.                                               | —                                       | ✓        |
| (9) Poder compartir mis preocupaciones y mis miedos con algún miembro del equipo de asistencia.                                                               | ✓                                       | ✓        |
| 2. Comunicación                                                                                                                                               | Presente en la versión del cuestionario |          |
| Preguntas de evaluación de las experiencias de los padres:<br>Escala analógica de 7 puntos, nunca - siempre                                                   | General                                 | Neonatal |
| (10) La información sobre mi hijo me ha sido transmitida de forma adecuada.                                                                                   | ✓                                       | ✓        |
| (11) Las malas noticias me han sido comunicadas delicadamente y de forma comprensiva.                                                                         | ✓                                       | ✓        |
| (12) He recibido información contradictoria.                                                                                                                  | ✓                                       | ✓        |
| (13) El equipo de asistencia ha atendido adecuadamente a mis preguntas.                                                                                       | ✓                                       | ✓        |
| (14) Si quería tener información sobre el estado de salud de mi hijo, tenía siempre que solicitarla.                                                          | ✓                                       | ✓        |
| (15) Fui bien informado sobre todas las opciones posibles de tratamiento.                                                                                     | ✓                                       | ✓        |
| ¿Cómo ha sido vuestra experiencia en la comunicación con los médicos?                                                                                         |                                         |          |
| Escala analógica de 7 puntos, incomprensible - comprensible                                                                                                   |                                         |          |
| (16) En general.                                                                                                                                              | ✓                                       | ✓        |
| Adicionalmente: escala analógica de 7 puntos, falsa - sincera                                                                                                 |                                         |          |
| (17) Sobre las posibilidades de tratamiento de los distintos síntomas.                                                                                        | ✓                                       | ✓        |

|                                                                                                                                                                                                                                                                                                                                                                                                                                                           |   |   |
|-----------------------------------------------------------------------------------------------------------------------------------------------------------------------------------------------------------------------------------------------------------------------------------------------------------------------------------------------------------------------------------------------------------------------------------------------------------|---|---|
| (18) Sobre las posibilidades y los límites de las medidas para mantener la vida.<br>Adicionalmente: escala analógica de 7 puntos, falsa – sincera<br>La opción de “no puedo responder” también estaba disponible                                                                                                                                                                                                                                          | ✓ | ✓ |
| (19) Sobre los posibles cambios corporales que podrían tener lugar en vuestro hijo durante el fallecimiento.<br>Adicionalmente: escala analógica de 7 puntos, falsa – sincera<br>La opción de “no puedo responder” también estaba disponible                                                                                                                                                                                                              | ✓ | ✓ |
| (20) ¿Fuisteis informados de que vuestro hijo podría fallecer?<br>Si - No                                                                                                                                                                                                                                                                                                                                                                                 | ✓ | ✓ |
| (21) a. ¿Cuándo fuisteis informados de que vuestro hijo podría fallecer?<br>Respuesta múltiple: Pocos días antes de la muerte de mi hijo – En las cuatro semanas antes de la muerte de mi hijo – En los seis meses antes de la muerte de mi hijo – Más de seis meses antes de la muerte de mi hijo                                                                                                                                                        | ✓ | — |
| (21) b. ¿Cuándo fuisteis informados de que vuestro hijo podría fallecer?<br>Respuesta múltiple: Antes del nacimiento de mi hijo – En las 24 h antes de la muerte de mi hijo – En la semana anterior a la muerte de mi hijo – En el mes anterior a la muerte de mi hijo                                                                                                                                                                                    | — | ✓ |
| (22) ¿Quién informó a vuestro hijo de que moriría?<br>Respuesta múltiple: No fue posible informar a mi hijo (por ejemplo: porque era muy pequeño, porque era discapacitado, porque estaba inconsciente...) – Yo o su otro progenitor – El médico junto a mí o a su otro progenitor – El médico solo – Otra persona – Mi hijo no quería oír hablar de eso – Yo o su otro progenitor no quisimos que nuestro hijo fuera informado sobre su muerte inminente | ✓ | — |
| <b>Preguntas de evaluación de las necesidades de los padres:</b><br>Escala analógica de 7 puntos, no tan importante - muy importante                                                                                                                                                                                                                                                                                                                      |   |   |
| <b>Necesitaba...</b>                                                                                                                                                                                                                                                                                                                                                                                                                                      |   |   |
| (23) Poder hacer preguntas en cualquier momento.                                                                                                                                                                                                                                                                                                                                                                                                          | ✓ | ✓ |
| (24) Ser informado continuamente sobre la situación de mi hijo.                                                                                                                                                                                                                                                                                                                                                                                           | ✓ | ✓ |
| (25) Saber cómo fallecería mi hijo.                                                                                                                                                                                                                                                                                                                                                                                                                       | ✓ | ✓ |
| (26) a. No perder la esperanza a pesar de la desesperada situación.                                                                                                                                                                                                                                                                                                                                                                                       | ✓ | — |
| (26) b. Ser informado con tiempo de la muerte inminente de mi hijo.                                                                                                                                                                                                                                                                                                                                                                                       | — | ✓ |

### 3. Toma de decisiones compartida

Presente en la versión del cuestionario

| <b>Preguntas de evaluación de las experiencias de los padres:</b><br>Escala analógica de 7 puntos, nunca - siempre                         | <b>General</b>  |   |
|--------------------------------------------------------------------------------------------------------------------------------------------|-----------------|---|
|                                                                                                                                            | <b>Neonatal</b> |   |
| (27) Estuve involucrado en todas las decisiones.                                                                                           | ✓               | ✓ |
| (28) Tenía suficiente información como para poder participar en la toma de decisiones.                                                     | ✓               | ✓ |
| (29) Pude cuestionar las decisiones tomadas y proponerlas para su discusión.                                                               | ✓               | ✓ |
| (30) ¿Fue tomada una decisión sobre las posibles medidas de reanimación cardiopulmonar (RCP) que podría necesitar vuestro hijo?<br>Si - No | ✓               | ✓ |

|                                                                                                                                                                                 |   |   |
|---------------------------------------------------------------------------------------------------------------------------------------------------------------------------------|---|---|
| (31) ¿Quién tomó esta decisión (a favor o en contra) sobre la realización de medidas de reanimación cardiopulmonar (RCP) a vuestro hijo?                                        | ✓ | ✓ |
| Respuesta múltiple: No se habló de eso – Yo – El otro progenitor – Nosotros como familia – El equipo de asistencia – Nosotros como familia junto al equipo de asistencia – Otro |   |   |
| (32) ¿Os fue comunicada la retirada de medidas terapéuticas cuando se volvían ineficaces?                                                                                       | ✓ | ✓ |
| Si - No                                                                                                                                                                         |   |   |
| (33) ¿Quién tomó la decisión (a favor o en contra) de la retirada de medidas terapéuticas ineficaces?                                                                           | ✓ | ✓ |
| Respuesta múltiple: No se habló de eso – Yo – El otro progenitor – Nosotros como familia – El equipo de asistencia – Nosotros como familia junto al equipo de asistencia – Otro |   |   |
| <b>Preguntas de evaluación de las necesidades de los padres:</b>                                                                                                                |   |   |
| Escala analógica de 7 puntos, no tan importante - muy importante                                                                                                                |   |   |
| <b>Necesitaba...</b>                                                                                                                                                            |   |   |
| (34) Participar en la toma de decisiones.                                                                                                                                       | ✓ | ✓ |
| (35) Que mis valores y mis convicciones fueran tomadas en consideración en el momento de la toma de decisiones.                                                                 | ✓ | ✓ |
| (36) No tener la sensación de tener que decidir solo.                                                                                                                           | ✓ | ✓ |
| (37) Que se hubiera hablado conmigo sobre la decisión de retirar las medidas terapéuticas ineficaces.                                                                           | ✓ | ✓ |

| 4. Alivio del dolor y de otros síntomas                                                                                                                            | Presente en la versión del cuestionario |          |
|--------------------------------------------------------------------------------------------------------------------------------------------------------------------|-----------------------------------------|----------|
| <b>Preguntas de evaluación de las experiencias de los padres:</b>                                                                                                  | General                                 | Neonatal |
| Escala analógica de 7 puntos, nunca - siempre                                                                                                                      |                                         |          |
| (38) Tuve la impresión de que los síntomas de mi hijo fueron aliviados de mejor modo posible.                                                                      | ✓                                       | ✓        |
| (39) Cuando mi hijo presentó dolor, éste fue reconocido.                                                                                                           | ✓                                       | ✓        |
| (40) El dolor de mi hijo fue tratado adecuadamente.                                                                                                                | ✓                                       | ✓        |
| (41) ¿Qué tres síntomas de vuestro hijo os preocuparon más?                                                                                                        |                                         |          |
| Lista de 26 (cuestionario general) o 13 (cuestionario neonatal) síntomas para elegir tres y ordenarlos en orden descendiente de importancia.                       | ✓                                       | ✓        |
| <b>Preguntas de evaluación de las necesidades de los padres:</b>                                                                                                   |                                         |          |
| Escala analógica de 7 puntos, no tan importante - muy importante                                                                                                   |                                         |          |
| <b>Necesitaba...</b>                                                                                                                                               |                                         |          |
| (42) a. Que mi hijo recibiera suficiente medicación para aliviar sus síntomas.                                                                                     | ✓                                       | —        |
| (42) b. Que mi hijo recibiera medicación para calmar su llanto, su inquietud...                                                                                    | —                                       | ✓        |
| (43) a. Que mi hijo se encontrara consciente y que pudiese jugar, hablar e interaccionar conmigo y con otras personas importantes para él.                         | ✓                                       | —        |
| (43) b. Tener contacto físico con mi hijo (por ejemplo: método canguro, contacto piel con piel, cogerlo en brazos, que lactara al pecho... o simplemente tocarlo). | —                                       | ✓        |
| (44) a. Que mi hijo recibiera tratamientos de medicinas complementarias y alternativas (por ejemplo: homeopatía).                                                  | ✓                                       | —        |

|                                                                                                                                   |   |   |
|-----------------------------------------------------------------------------------------------------------------------------------|---|---|
| (44) b. Que mi hijo pudiera beneficiarse también de medidas no farmacológicas (por ejemplo: masajes, estar arropado...).          | — | ✓ |
| (45) a. Que a mi hijo le fueran administrados líquidos hasta el final.                                                            | ✓ | — |
| (45) b. Poder alimentar yo mismo a mi hijo: administrar la leche a través de la sonda nasogástrica, en el biberón o con una gasa. | — | ✓ |

| 5. Continuidad y coordinación en la asistencia                                                                                                                                                                                                                                                                          | Presente en la versión del cuestionario |          |
|-------------------------------------------------------------------------------------------------------------------------------------------------------------------------------------------------------------------------------------------------------------------------------------------------------------------------|-----------------------------------------|----------|
|                                                                                                                                                                                                                                                                                                                         | General                                 | Neonatal |
| <b>Preguntas de evaluación de las experiencias de los padres:</b>                                                                                                                                                                                                                                                       |                                         |          |
| Escala analógica de 5 puntos, no estoy en absoluto de acuerdo – no estoy de acuerdo – estoy parcialmente de acuerdo – estoy bastante de acuerdo – estoy completamente de acuerdo                                                                                                                                        |                                         |          |
| La opción de “no puedo responder” también estaba disponible                                                                                                                                                                                                                                                             |                                         |          |
| (46) Existía un profesional que coordinaba la asistencia a mi hijo.                                                                                                                                                                                                                                                     | ✓                                       | ✓        |
| (47) En el hospital, tenía un médico de referencia constante que conocía nuestro caso y con quien siempre podía hablar.                                                                                                                                                                                                 | ✓                                       | ✓        |
| (48) a. En casa, los enfermeros que atendían a mi hijo eran los mismos en la mayoría de las ocasiones.                                                                                                                                                                                                                  | ✓                                       | —        |
| (48) b. En el hospital, tenía un enfermero de referencia constante que conocía nuestro caso y con quien siempre podía hablar.                                                                                                                                                                                           | —                                       | ✓        |
| (49) Todo el equipo de asistencia estaba siempre al corriente de la situación actualizada de mi hijo.                                                                                                                                                                                                                   | ✓                                       | ✓        |
| (50) ¿Quién os ha ayudado principalmente en la organización de los cuidados a vuestro hijo durante sus últimas cuatro semanas de vida?                                                                                                                                                                                  |                                         |          |
| Respuesta múltiple: El médico responsable del hospital – Nuestro médico de cabecera/médico de familia – El Pediatra del centro de salud – El equipo de cuidados paliativos pediátricos – Un enfermero especializado del hospital – Nuestro asistente social – Nuestro psicólogo – Nuestro fisioterapeuta – Nadie - Otro | ✓                                       | —        |
| <b>Preguntas de evaluación de las necesidades de los padres:</b>                                                                                                                                                                                                                                                        |                                         |          |
| Escala analógica de 7 puntos, no tan importante - muy importante                                                                                                                                                                                                                                                        |                                         |          |
| <b>Necesitaba...</b>                                                                                                                                                                                                                                                                                                    |                                         |          |
| (51) Tener una persona de referencia dentro del equipo de asistencia que coordinara toda la atención que recibiera mi hijo.                                                                                                                                                                                             | ✓                                       | ✓        |
| (52) Ser atendidos siempre por el mismo médico.                                                                                                                                                                                                                                                                         | ✓                                       | ✓        |
| (53) Que mi hijo fuera atendido normalmente por los mismos enfermeros.                                                                                                                                                                                                                                                  | ✓                                       | ✓        |

| 6. Atención en torno a la muerte de vuestro hijo                                                                                                                                 | Presente en la versión del cuestionario |          |
|----------------------------------------------------------------------------------------------------------------------------------------------------------------------------------|-----------------------------------------|----------|
|                                                                                                                                                                                  | General                                 | Neonatal |
| <b>Preguntas de evaluación de las experiencias de los padres:</b>                                                                                                                |                                         |          |
| Escala analógica de 5 puntos, no estoy en absoluto de acuerdo – no estoy de acuerdo – estoy parcialmente de acuerdo – estoy bastante de acuerdo – estoy completamente de acuerdo |                                         |          |
| La opción de “no puedo responder” también estaba disponible                                                                                                                      |                                         |          |
| (54) He podido estar todo el tiempo que deseaba cerca de mi hijo al final de su vida.                                                                                            | ✓                                       | ✓        |

|                                                                                                                                                                                                                                                                                                                                |   |   |
|--------------------------------------------------------------------------------------------------------------------------------------------------------------------------------------------------------------------------------------------------------------------------------------------------------------------------------|---|---|
| (55) a. El equipo de asistencia me dio la ayuda necesaria para que mi hijo pudiera fallecer donde deseaba.                                                                                                                                                                                                                     | ✓ | — |
| (55) b. El equipo de asistencia me dio su apoyo para crear recuerdos de mi hijo (por ejemplo: fotos, vídeos, la impronta de la huella del pie...)                                                                                                                                                                              | — | ✓ |
| (56) He podido despedirme de mi hijo de la forma que deseaba.                                                                                                                                                                                                                                                                  | ✓ | ✓ |
| (57) Encontré consuelo en torno a la muerte de mi hijo.                                                                                                                                                                                                                                                                        | ✓ | ✓ |
| (58) a. ¿Dónde falleció vuestro hijo?<br>Respuesta múltiple: En UCIP (Unidad de Cuidados Intensivos Pediátricos) – En UCI de adultos (Unidad de Cuidados Intensivos del Hospital General) – En la sala de Oncología Infantil – En una sala del hospital infantil (lactantes, escolares, aislados...) – En casa – En otro lugar | ✓ | — |
| (58) b. ¿Dónde falleció vuestro hijo?<br>Respuesta múltiple: En UCIN (Unidad de Cuidados Intensivos Neonatales) – En UCIP (Unidad de Cuidados Intensivos Pediátricos) – En la sala de Neonatología – En una sala del hospital infantil (lactantes, escolares, aislados...) – En casa – En otro lugar                           | — | ✓ |
| (59) ¿Os encontrabais con vuestro hijo en el momento de fallecimiento?<br>Si - No                                                                                                                                                                                                                                              | ✓ | ✓ |
| (60) ¿Estuvieron también los hermanos, familiares y/o amigos que vosotros deseabais en el momento del fallecimiento?<br>Si - No                                                                                                                                                                                                | ✓ | ✓ |
| (61) Después de la muerte de vuestro hijo, ¿lo habéis lavado y vestido vosotros o habéis ayudado a hacerlo?<br>Si - No                                                                                                                                                                                                         | ✓ | ✓ |
| (62) En las primeras semanas tras el fallecimiento de vuestro hijo, ¿tuvisteis contacto con algún miembro del equipo de asistencia?<br>Si - No                                                                                                                                                                                 | ✓ | ✓ |
| (63) Después de la muerte de vuestro hijo, ¿habéis tenido alguna conversación con algún miembro del equipo de asistencia (por ejemplo: sobre la duración de la enfermedad, sobre la muerte de vuestro hijo o sobre su calidad de vida)?<br>Si - No                                                                             | ✓ | ✓ |
| (64) Por favor, decidnos qué servicios de ayuda (por ejemplo: grupos de ayuda para padres y madres que han perdido un hijo, psicólogo, terapias familiares...) habéis utilizado durante el periodo de luto y si todavía continuáis utilizándolos.<br>Texto libre                                                               | ✓ | ✓ |

#### Preguntas de evaluación de las necesidades de los padres:

Escala analógica de 7 puntos, no tan importante - muy importante

#### Necesitaba...

|                                                                                                                                                                                       |   |   |
|---------------------------------------------------------------------------------------------------------------------------------------------------------------------------------------|---|---|
| (65) Elegir el lugar de fallecimiento de mi hijo.<br>La opción de “no puedo responder” también estaba disponible                                                                      | ✓ | ✓ |
| (66) Que mis familiares y/o amigos pudieran despedirse de mi hijo.                                                                                                                    | ✓ | ✓ |
| (67) Ser ayudado por el equipo de asistencia en las horas siguientes al fallecimiento de mi hijo.                                                                                     | ✓ | ✓ |
| (68) Llevar a mi hijo a casa después del fallecimiento para que el resto de la familia y/o amigos pudieran despedirse.<br>La opción de “no puedo responder” también estaba disponible | ✓ | ✓ |

- |                                                                                                        |   |   |
|--------------------------------------------------------------------------------------------------------|---|---|
| (69) Que algún miembro del equipo de asistencia acudiera al funeral de mi hijo.                        | ✓ | ✓ |
| La opción de “no puedo responder” también estaba disponible                                            |   |   |
| (70) Continuar en contacto con algún miembro del equipo de asistencia después de la muerte de mi hijo. | ✓ | ✓ |

| Grado de satisfacción con la atención recibida y otros                                                                                                                                                                               | Presente en la versión del cuestionario |          |
|--------------------------------------------------------------------------------------------------------------------------------------------------------------------------------------------------------------------------------------|-----------------------------------------|----------|
|                                                                                                                                                                                                                                      | General                                 | Neonatal |
| <b>En general, indique su grado de satisfacción con respecto a:</b>                                                                                                                                                                  |                                         |          |
| Escala analógica de 7 puntos, insatisfecho – indiferente - satisfecho                                                                                                                                                                |                                         |          |
| (71) El apoyo a usted y a su familia.                                                                                                                                                                                                | ✓                                       | ✓        |
| (72) Comunicación con usted y con su familia.                                                                                                                                                                                        | ✓                                       | ✓        |
| (73) Toma de decisiones conjunta o compartida.                                                                                                                                                                                       | ✓                                       | ✓        |
| (74) Alivio del dolor y de los otros síntomas.                                                                                                                                                                                       | ✓                                       | ✓        |
| (75) Continuidad y coordinación en la asistencia.                                                                                                                                                                                    | ✓                                       | ✓        |
| (76) Atención en torno a la muerte de vuestro hijo.                                                                                                                                                                                  | ✓                                       | ✓        |
| (77) Os rogamos que nos contéis tres experiencias positivas en relación con la atención recibida por vuestro hijo y por vuestra familia durante las últimas cuatro semanas de vida de vuestro hijo.                                  | ✓                                       | ✓        |
| Texto libre                                                                                                                                                                                                                          |                                         |          |
| (78) Os rogamos que nos contéis tres experiencias negativas en relación con la atención recibida por vuestro hijo y por vuestra familia durante las últimas cuatro semanas de vida de vuestro hijo.                                  | ✓                                       | ✓        |
| Texto libre                                                                                                                                                                                                                          |                                         |          |
| (79) ¿Qué aspectos de vuestra vida privada se han visto influenciados negativamente por la muerte y la enfermedad de vuestro hijo?                                                                                                   |                                         |          |
| Respuesta múltiple (se podían seleccionar varias respuestas): La familia – La relación de pareja – El contexto social – El trabajo – El nivel económico – La salud – La salud de otro familiar – El estado de ánimo – Ninguno - Otro | ✓                                       | ✓        |
| (80) ¿Cuál es su calidad de vida actual sobre la siguiente escala?                                                                                                                                                                   |                                         |          |
| Escala analógica en vertical de 11 puntos, 0 (la peor calidad de vida posible) – 10 (la mejor calidad de vida posible)                                                                                                               | ✓                                       | ✓        |
| (81) ¿Nos querría contar alguna experiencia o alguna cosa más?                                                                                                                                                                       | ✓                                       | ✓        |
| Texto libre                                                                                                                                                                                                                          |                                         |          |

| Preguntas sociodemográficas                                                  | Presente en la versión del cuestionario |          |
|------------------------------------------------------------------------------|-----------------------------------------|----------|
|                                                                              | General                                 | Neonatal |
| (82) Vuestro estado civil cuando falleció vuestro hijo.                      |                                         |          |
| Respuesta múltiple: Casado/en pareja – Separado/divorciado – Soltero - Viudo | ✓                                       | ✓        |
| (83) Vuestro estado civil actual.                                            |                                         |          |
| Respuesta múltiple: Casado/en pareja – Separado/divorciado – Soltero - Viudo | ✓                                       | ✓        |
| (84) Su fecha de nacimiento.                                                 |                                         |          |
| Se solicita solo el año de nacimiento.                                       | ✓                                       | ✓        |

|                                                                                                                                                                                                                                                                                                                                                                                         |   |   |
|-----------------------------------------------------------------------------------------------------------------------------------------------------------------------------------------------------------------------------------------------------------------------------------------------------------------------------------------------------------------------------------------|---|---|
| (85) Su nacionalidad.                                                                                                                                                                                                                                                                                                                                                                   | ✓ | ✓ |
| Respuesta múltiple: Española – Marroquí - Otra                                                                                                                                                                                                                                                                                                                                          |   |   |
| (86) ¿En qué lengua se expresa usted mejor?                                                                                                                                                                                                                                                                                                                                             | ✓ | ✓ |
| Respuesta múltiple: Español – Árabe - Otra                                                                                                                                                                                                                                                                                                                                              |   |   |
| (87) Tiempo de residencia en España.                                                                                                                                                                                                                                                                                                                                                    |   |   |
| Respuesta múltiple: Desde el nacimiento – Desde hace más de 20 años – Desde hace más de 10 años – Desde hace más de 5 años – Desde hace más de 2 años – Desde hace menos de 2 años                                                                                                                                                                                                      | ✓ | ✓ |
| (88) ¿A qué religión pertenece?                                                                                                                                                                                                                                                                                                                                                         |   |   |
| Respuesta múltiple: Iglesia católica – Iglesia protestante – Iglesia evangélica – Islam – Hinduismo – Judaísmo – Ninguna - Otra                                                                                                                                                                                                                                                         | ✓ | ✓ |
| (89) Número total de hijos (teniendo en cuenta al fallecido).                                                                                                                                                                                                                                                                                                                           | ✓ | ✓ |
| (90) ¿Alguno de sus otros hijos también ha fallecido?                                                                                                                                                                                                                                                                                                                                   | ✓ | ✓ |
| Si - No                                                                                                                                                                                                                                                                                                                                                                                 |   |   |
| (91) ¿Cuál era su situación laboral cuando falleció vuestro hijo?                                                                                                                                                                                                                                                                                                                       |   |   |
| Respuesta múltiple: Trabajando fuera de casa – De baja – De vacaciones – De excedencia laboral no remunerada – Trabajando en casa (por ejemplo: ama de casa...) – En paro - Estudiando                                                                                                                                                                                                  | ✓ | ✓ |
| (92) ¿Cuál es su situación laboral actual?                                                                                                                                                                                                                                                                                                                                              |   |   |
| Respuesta múltiple: Trabajando fuera de casa – De baja – De excedencia laboral no remunerada – Trabajando en casa (por ejemplo: ama de casa...) – En paro - Estudiando                                                                                                                                                                                                                  | ✓ | ✓ |
| (93) Nivel de estudios completado.                                                                                                                                                                                                                                                                                                                                                      |   |   |
| Respuesta múltiple: Básico (EGB o Primaria) – Enseñanza media (BUP o FP) o Enseñanza Secundaria Obligatoria (ESO) – Bachillerato, formación profesional de grado medio o COU – Formación profesional de grado superior, enseñanzas artísticas superiores o enseñanzas deportivas de grado superior – Diplomatura – Licenciatura o grado – Ninguna formación académica completada - Otra | ✓ | ✓ |
| (94) Ingresos familiares (del hogar) brutos anuales.                                                                                                                                                                                                                                                                                                                                    |   |   |
| Respuesta múltiple: Menos de 16.000 € - Entre 16.000 y 30.000 € - Entre 31.000 y 50.000 € - Entre 51.000 y 100.000 € - Entre 101.000 y 150.000 € - Entre 151.000 y 200.000 € - Más de 200.000 €                                                                                                                                                                                         | ✓ | ✓ |
